# Supplementary material
Source: publisher figshare collection journal article supplement (https://geolsoc.figshare.com/ndownloader/files/5426675)
Supplement: Supplementary file 1 [file 5426675]

Table 7. Confined track-length parameter in apatite
Sample	N	MTL (�m)	Error	Std.
5C-6	191	12.39	0.14	1.99
5C-23a	168	13.16	0.15	1.92
5C-32	252	13.40	0.10	1.53
5CO-4b	250	13.37	0.09	1.34
5CO-6b	251	13.78	0.08	1.33
5PB-5c	250	13.81	0.08	1.20
5PB-6b	250	13.34	0.09	1.38
G11s	250	12.33	0.12	1.93
G12s	21	11.31	0.76	3.48
GM9s	79	11.88	0.25	2.20
GM13s	41	10.94	0.51	3.28
GM15s	65	12.67	0.28	2.30
824	69	12.48	0.24	1.98
825	292	12.85	0.08	1.42
846	252	13.28	0.09	1.37
N: number of tracks; MTL: mean track length; Std.: standard deviation.
